# Supplementary material for: Decolorization of Textile Azo Dye via Solid-State Fermented Wheat Bran by Lasiodiplodia sp. YZH1
Source: MDPI journal article supplement (doi:10.3390/jof9111069), 2023-11-01
Supplement: s1 [file s1]

# Decolorization of Textile Azo Dye via Solid-State Fermented Wheat Bran by *Lasiodiplodia* sp. YZH1

Ali Borham<sup>1,2,3</sup>, Mohammad K. Okla<sup>4</sup>, Mohamed A. El-Tayeb<sup>4</sup>, Ahmed Gharib<sup>5</sup>, Hanan Hafiz<sup>6</sup>, Lei Liu<sup>7</sup>, Chen Zhao<sup>7</sup>, Ruqing Xie<sup>7</sup>, Nannan He<sup>7</sup>, Siwen Zhang<sup>7</sup>, Juanjuan Wang<sup>1,7</sup> and Xiaoqing Qian<sup>1,7,\*</sup>

<sup>1</sup> Key Laboratory of Cultivated Land Quality Monitoring and Evaluation, Ministry of Agriculture and Rural Affairs, Yangzhou University, Yangzhou 225127, China; ali.borham@agr.kfs.edu.eg (A.B.); wangjuanjuan@yzu.edu.cn (J.W.); qianxq@yzu.edu.cn (X.Q.)

<sup>2</sup> Agriculture Products Safety and Environment, College of Agriculture, Yangzhou University, Yangzhou 225127, China

<sup>3</sup> Agricultural Botany Department, Faculty of Agriculture, Kafrelsheikh University, Kafr El-Sheikh 33516, Egypt

<sup>4</sup> Botany and Microbiology Department, College of Science, King Saud University, P.O. Box 2455, Riyadh 11451, Saudi Arabia; malokla@ksu.edu.sa (M.K.O.); mali5@ksu.edu.sa (M.A.E.-T.)

<sup>5</sup> National Institute of Laser Enhanced Sciences (NILES), Cairo University, Giza 12613, Egypt; ahmgharib@niles.edu.eg (A.G.)

<sup>6</sup> Biotechnology Department, Faculty of Science, Damietta University, New Damietta 34517, Egypt; hananhafizz5@gmail.com (H.H.)

<sup>7</sup> College of Environmental Science and Engineering, Yangzhou University, Yangzhou 225127, China; ll18252788565@163.com (L.L.); zhaochen1117yz@163.com (C.Z.); 15252753630@163.com (R.X.); hnn991012@163.com (N.H.); zhangsiwen980202@163.com (S.Z.)

\* Correspondence: qianxq@yzu.edu.cn

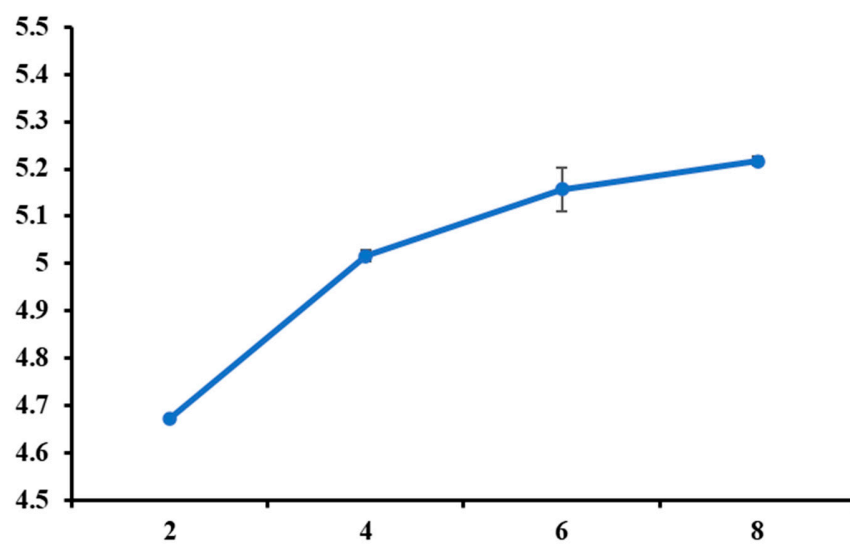

**Figure S1.** pH of the fermented wheat bran with *Lasioidiplodia* sp. YZH1 under SSF condition at a period of 8 days.
